# Supplementary material
Source: PubMed Central journal article supplement (PMC3659983)
Supplement: supp_2012.076430_2012_076430-Contributions.pdf [file supp_2012.076430_2012_076430-Contributions.pdf]

*Manuscript no. HAEMATOL/2012/076430 entitled “Robust and cost effective expansion of human regulatory T cells highly functional in a xenograft model of graft versus host disease“*

*Authors: Rikhia Chakraborty, Aruna Mahendravada, Serena K. Perna, Cliona M Rooney, Helen E Heslop, Juan F. Vera, Barbara Savoldo and Gianpietro Dotti*

*Information about the contributions of each person named as having participated in the study*

**1) Guarantor(s), i.e., person(s) who is (are) responsible for the integrity of the work as a whole:**

- Gianpietro Dotti, Baylor College of Medicine, gdotti@bcm.edu

According to the International Committee of Medical Journal Editors (ICMJE) ([http://www.icmje.org/ethical\\_1author.html](http://www.icmje.org/ethical_1author.html)): “Authorship credit should be based on: 1) substantial contributions to conception and design, acquisition of data, or analysis and interpretation of data; 2) drafting the article or revising it critically for important intellectual content; and 3) final approval of the version to be published. Authors should meet conditions 1, 2, and 3 ..... Acquisition of funding, collection of data, or general supervision of the research group alone does not constitute authorship”.

The guarantors of this manuscript confirm that all persons designated as authors qualify for authorship, and that each author has participated sufficiently in the work to take public responsibility for appropriate portions of the content.

**2) Authors who participated in the conception of the study:** Gianpietro Dotti, Barbara Savoldo and Rikhia Chakraborty

**3) Design & Methods.** The following authors were responsible for specific investigations: Rikhia Chakraborty, Barbara Savoldo and Gianpietro Dotti designed the Treg expansion protocol

**4) Results.** The following authors were responsible for specific portions of the results, including figures and tables:

- Rikhia Chakraborty performed initial optimization
- Rikhia Chakraborty and Barbara Savoldo validated the CliniMACS isolation and subsequent expansion and optimized the mouse model of GvHD
- Cliona M Rooney, Helen Heslop and Juan Vera provided crucial expertise in the use of the G-Rex device
- Serena K Perna and Barbara Savoldo performed initial optimization of the CFSE-based suppression assay
- Aruna Mahendravada, provided crucial assistance with the in vivo experiments

**5) Writing the manuscript.** The following authors were responsible for writing the manuscript:

- Gianpietro Dotti
- Barbara Savoldo
- Rikhia Chakraborty

**6) Contributors Listed in Acknowledgments:**

- Dr. Roger Price for pathological evaluations
- Dr. Cecilia Ljungberg for assistance with immunohistochemistry
- Reshma Kulkarni for the phenotypic analyses
